# Supplementary material for: Diarylethene-based photochromic polyurethanes for multistate optical memories
Source: Royal Society of Chemistry journal article supplement (doi:10.1039/c1jm11870f), 2011-01-01
Supplement: c1jm11870f.pdf [file c1jm11870f.pdf]

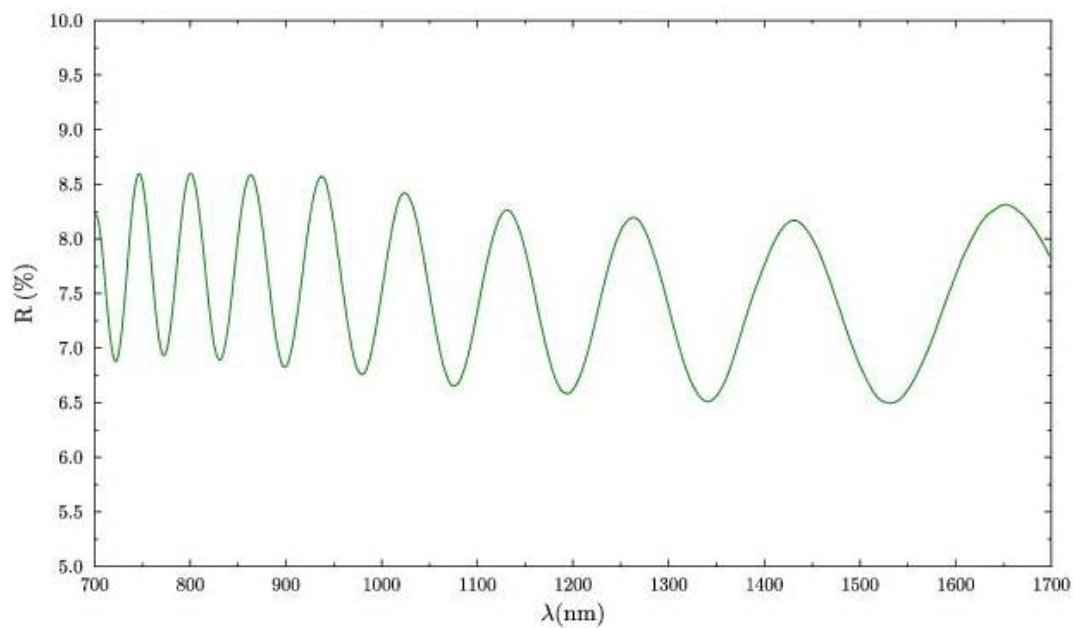

Reflectance spectrum of a polyurethane thin film, showing the interference pattern; the constant amplitude of the fringes in all the spectral range is a sign of good homogeneity and low surface roughness of the film.
